# Supplementary material
Source: publisher figshare collection journal article supplement (https://acs.figshare.com/ndownloader/files/13052096)
Supplement: Supplementary file 1 [file 13052096]

# Supporting Information

## Exfoliated Monolayer GeI<sub>2</sub>: Theoretical Prediction of a Wide-Band Gap Semiconductor with Tunable Half-Metallic Ferromagnetism

Chun-Sheng Liu\*, Xiao-Le Yang, Jin Liu, and Xiao-Juan Ye\*

Key Laboratory of Radio Frequency and Micro-Nano Electronics of Jiangsu Province,  
College of Electronic and Optical Engineering, Nanjing University of Posts and  
Telecommunications, Nanjing 210023, China

\*E-mail: csliu@njupt.edu.cn (C.-S.L.)

\*E-mail: yexj@njupt.edu.cn (X.-J.Y.)

## I. The structural and electronic properties of bulk GeI<sub>2</sub>

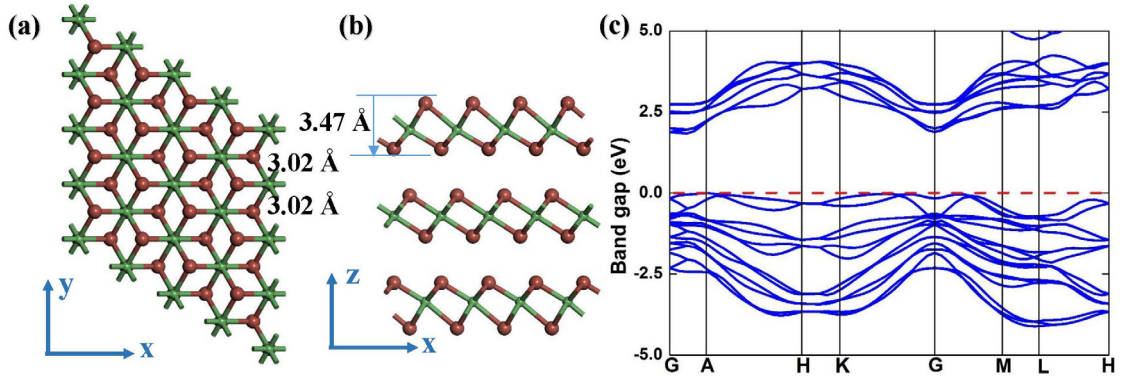

**Figure S1.** The optimized bulk GeI<sub>2</sub> structure in top a) and side b) views. c) The band structures of bulk GeI<sub>2</sub> with HSE+SOC functional.

## II. Molecular dynamics simulations of monolayer GeI<sub>2</sub>

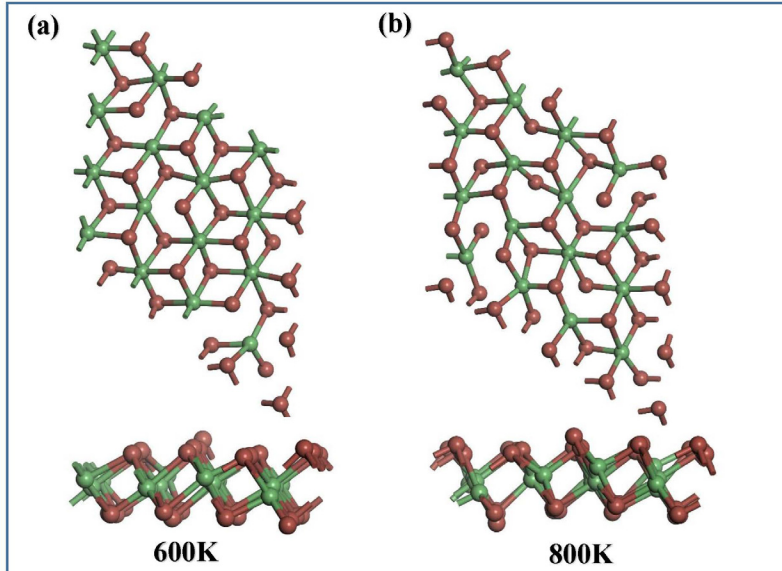

**Figure S2.** The snapshots of top and side views of the final atomic configurations at a) 600 and b) 800 K.

## III. In-plane stiffness ( $C_{2D}$ )

$C_{2D}$  is defined as  $(E - E_0)/S_0 = C_{2D}(\Delta l/l_0)^2/2$ , where  $E_0$  is the total energy of cell without dilation and  $S_0$  is the equilibrium lattice area. The strain step of this data calculation is 0.5%. The relationship between  $\Delta E = E - E_0$  and  $\Delta l/l_0$  is shown in Figure S3. According to our computation, the in-plane stiffness  $C_{2D}$  of monolayer GeI<sub>2</sub> is 30.79 (30.80) N/m along the  $a$  ( $b$ ) direction.

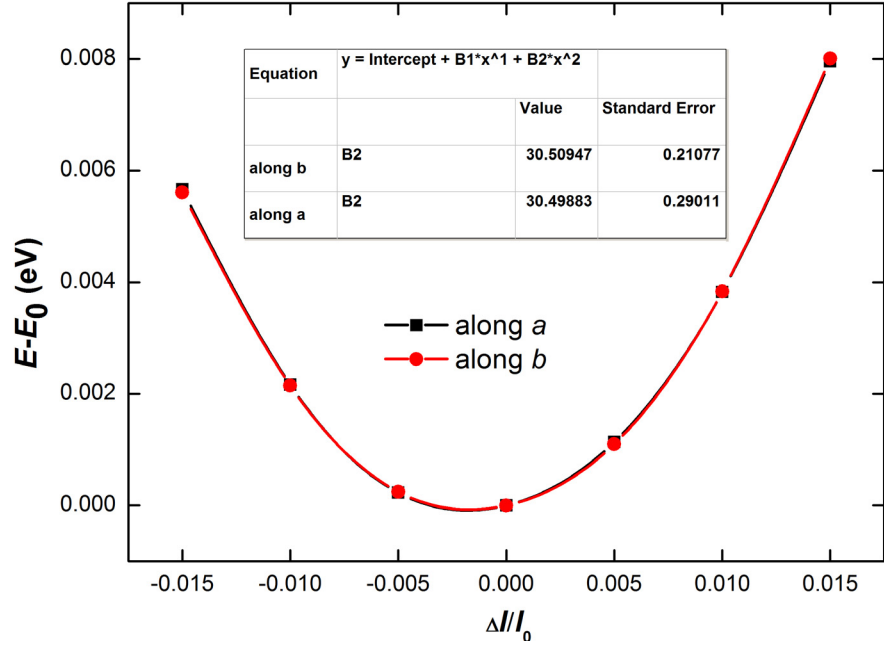

**Figure S3.** The total energy shift  $E-E_0$  as a function of lattice deformation  $\Delta l/l_0$  along  $a$  and  $b$  directions of monolayer  $\text{GeI}_2$ .

#### IV. The electronic properties of multi-layered $\text{GeI}_2$ systems

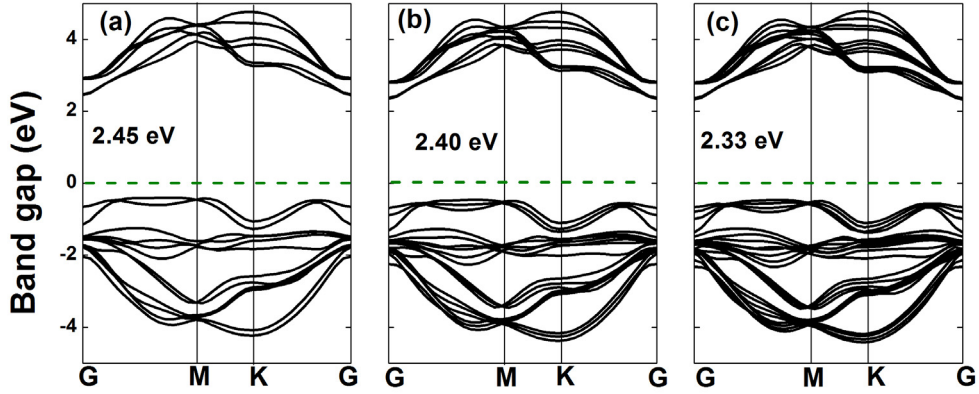

**Figure S4.** The band structures of (a) bi-, (b) three-, and (c) four-layered  $\text{GeI}_2$  systems from HSE06+SOC functional.

#### V. Carrier mobility

According to the deformation potential (DP) theory, the carrier mobility of 2D materials can be estimated by the following expression:

$$\mu = \frac{e\hbar^3 C_{2D}}{K_B T m_i^* m_d (E_1^i)^2}$$

where  $\hbar$ ,  $K_B$ ,  $T$ , and  $m^*$  are the reduced Planck constant, Boltzmann constant,

temperature (300 K), and effective mass, respectively.  $m_i^*$  ( $i = h$  for holes,  $i = e$  for electrons) is based on the effective mass approximation  $m^* = \hbar^2 (\partial^2 E / \partial K^2)^{-1}$ . The effective masses along the  $a$  ( $b$ ) direction are 0.25 (0.28)  $m_0$  for electron and 0.72 (0.44)  $m_0$  for hole. The average effective mass  $m_d$  is determined by  $m_d = \sqrt{m_x^* m_y^*}$ . The deformation potential constant  $E_1$  is defined by  $\frac{\Delta V}{\Delta l / l_0}$ , which represents the energy of CBM for electrons and the VBM for holes along the transport ( $a$  and  $b$ ) direction.  $\Delta V$  is the energy change (conduction band or valence band) under certain strain. The  $l_0$  is the lattice constant along the transport direction, and  $\Delta l$  is the deformation of  $l_0$ . The relationship between  $E_1$  and dilation  $\Delta l / l_0$  is shown in Figure S5. The deformation potentials ( $E_1$ ) are -6.31 (-6.37) eV for electron and -3.60 (-5.49) eV for hole along the  $a$  ( $b$ ) direction, respectively.

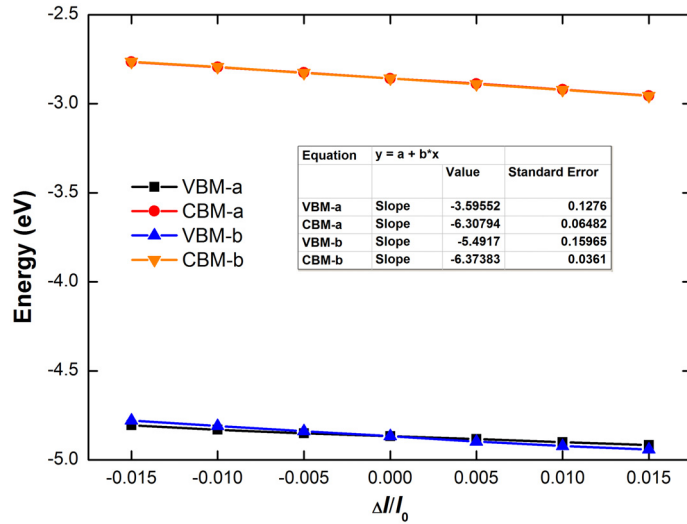

**Figure S5.** The relationship between the energy shift of the band edge position with the dilation  $\Delta l / l_0$ .

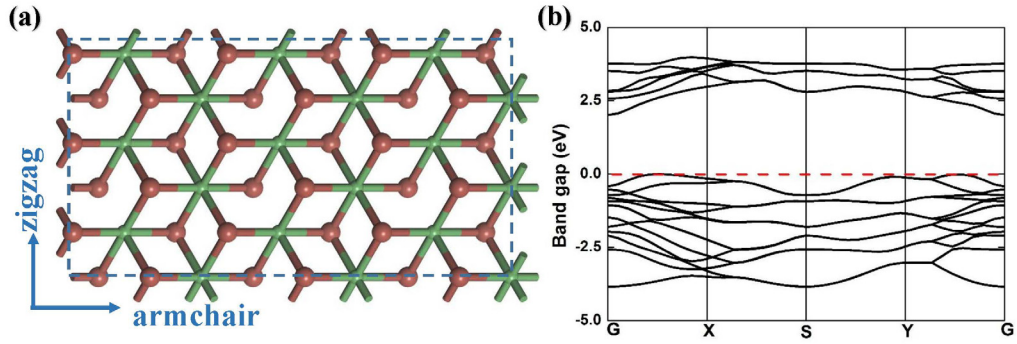

**Figure S6.** (a) The structure of monolayer  $\text{GeI}_2$  with the rectangular supercell. (b) The band structure of its rectangular supercell.

## VI. The deformation charge density, phonon spectrum, magnetism orders, and band structure of $\text{GeI}_2\text{H}$

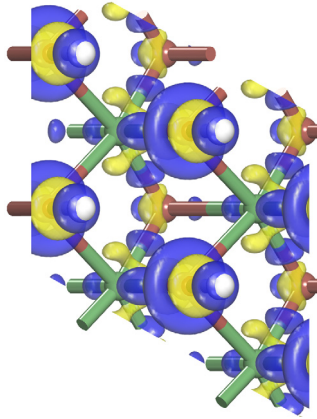

**Figure S7.** The deformation charge density plots of  $\text{GeI}_2\text{H}$ . The iso-surface value is  $0.015 \text{ e}\text{\AA}^3$ . The yellow and blue areas represent the electron depletion and accumulation regions, respectively.

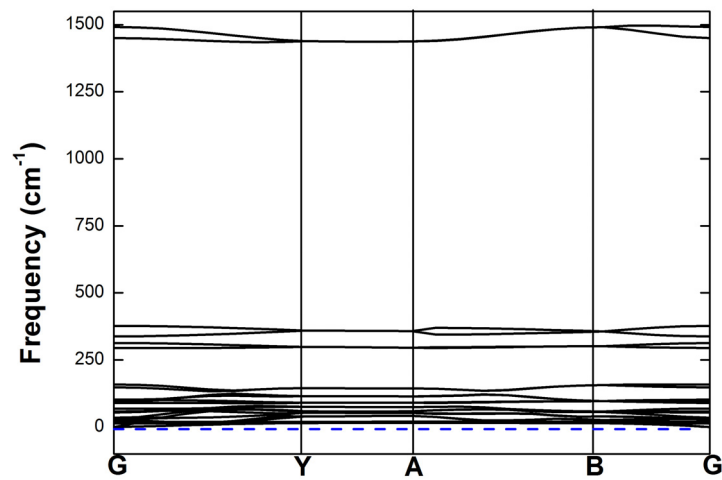

**Figure S8.** The phonon spectrum of hydrogenated  $\text{GeI}_2$ .

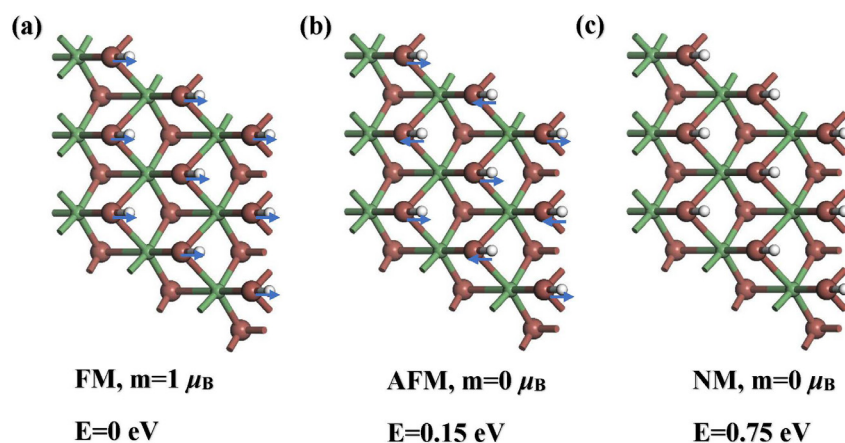

**Figure S9.** Three magnetic configurations of hydrogenated  $\text{GeI}_2$ , including the magnetic moments and their relative energies with respect to the FM state for a) FM, b) AFM, and c) NM states.

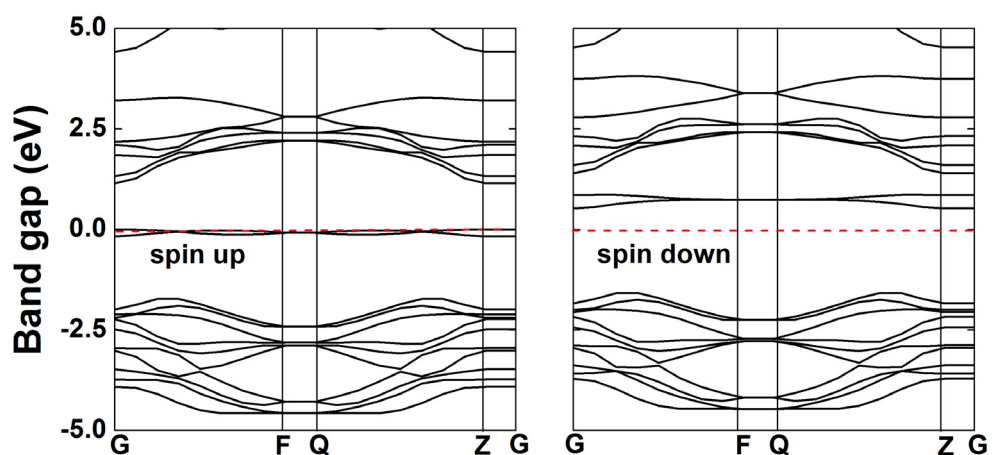

**Figure S10.** The spin-up and the spin-down band structures of  $\text{GeI}_2\text{H}$ .
